# Supplementary material for: Hapten Synthesis and Monoclonal Antibody Preparation for Simultaneous Detection of Albendazole and Its Metabolites in Animal-Origin Food
Source: MDPI journal article supplement (doi:10.3390/foods10123106), 2021-12-14
Supplement: s1 [file s1]

## Supplementary Material

### Buffers

The common buffer solutions used in the experiment are listed:

- (1) Coating buffer (0.05 mol L<sup>-1</sup> carbonate buffer, pH 9.6)
- (2) Phosphate buffer solution (PBS buffer, 0.01 mol L<sup>-1</sup>, pH 7.4)
- (3) Blocking buffer (2% skim milk powder (w/v))
- (4) Washing buffer (PBST, PBS buffer with 0.05% Tween-20 (v/v), pH 7.2)
- (5) antibody dilution buffer (PBS buffer with 0.2% albumin, (w/v));
- (6) Goat anti-mouse IgG (HRP labeled) dilution buffer (PBS buffer with 5% albumin (w/v))
- (7) Stopping reagent (2 mol L<sup>-1</sup> H<sub>2</sub>SO<sub>4</sub>)

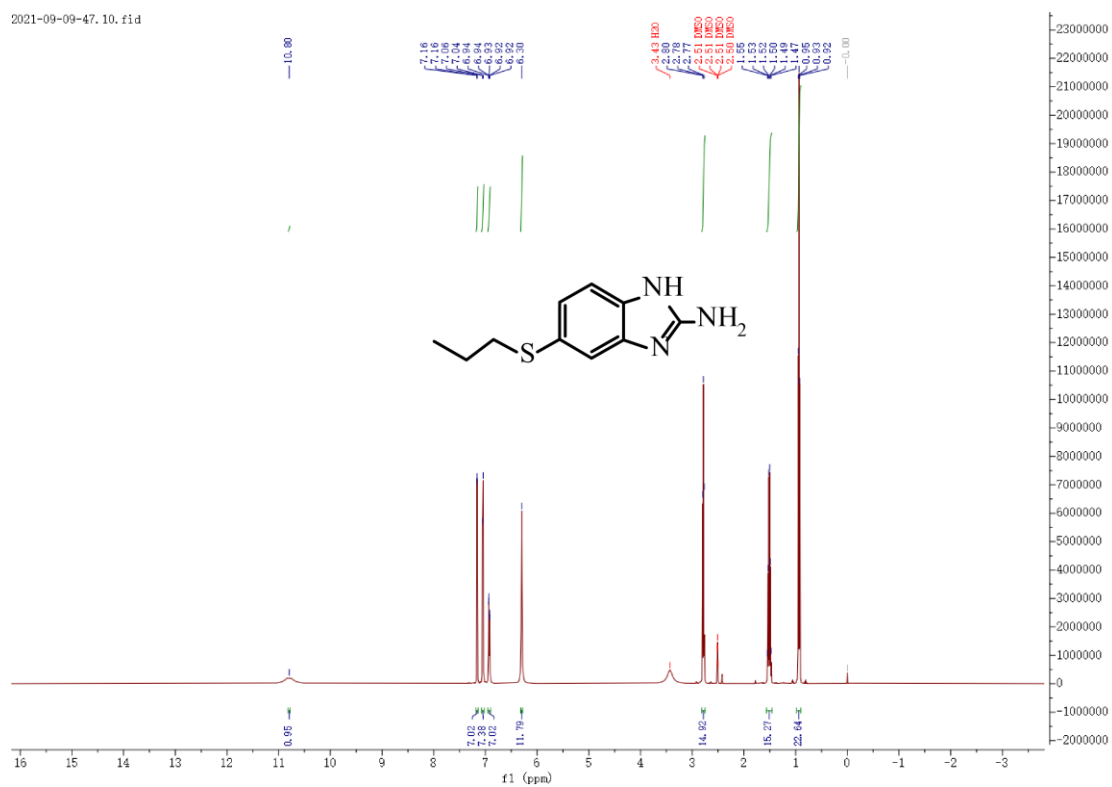

**Figure S1.**  $^1\text{H}$  NMR spectra of hapten.
